# Supplementary material
Source: publisher figshare collection journal article supplement (https://frontiersin.figshare.com/ndownloader/files/34003670)
Supplement: Supplementary file [file 34003670]

Table 1. Details of search strategy.

| Number | Search term                                     |
|--------|-------------------------------------------------|
| 1      | TS=(chemotherapy)                               |
| 2      | TS=(antineoplastic agents)                      |
| 3      | TS=(oxaliplatin)                                |
| 4      | TS=(paclitaxel)                                 |
| 5      | TS=(docetaxel)                                  |
| 6      | TS=(vinorelbine)                                |
| 7      | TS=(bortezomib)                                 |
| 8      | TS=(vinc*)                                      |
| 9      | TS=(cisplatin)                                  |
| 10     | TS=(taxane)                                     |
| 11     | TS=(neurotoxicity)                              |
| 12     | TS=(neurop*)                                    |
| 13     | TS=(nerve)                                      |
| 14     | 1 OR 2 OR 3 OR 4 OR 5 OR 6 OR 7 OR 8 OR 9 OR 10 |
| 15     | 11 OR 12 OR 13                                  |
| 16     | 14 AND 15                                       |

TS = title, abstract, author keywords and keywords plus.

\* = any ending to the word.
